# Supplementary material
Source: PubMed Central journal article supplement (PMC5865437)
Supplement: 2017.184226.YADAV_SUPPL.pdf [file 2017.184226.YADAV_SUPPL.pdf]

**Cytogenetic aberrations in multiple myeloma are associated with shifts in serum immunoglobulin isotypes distribution and levels**

Pankaj Yadav,<sup>1</sup> Maximilian Merz,<sup>2</sup> Elias K. Mai,<sup>2</sup> Asta Försti,<sup>1,3</sup> Anna Jauch,<sup>4</sup> Hartmut Goldschmidt,<sup>2,5,\*</sup> Kari Hemminki<sup>1,3\*</sup>  
\*HG and KH share co-senior authorship.

<sup>1</sup>Division of Molecular Genetic Epidemiology, German Cancer Research Center (DKFZ), Heidelberg, Germany; <sup>2</sup>Department of Internal Medicine V, University Hospital Heidelberg, Germany; <sup>3</sup>Center for Primary Health Care Research, Lund University, Malmö, Sweden; <sup>4</sup>Institute of Human Genetics, University of Heidelberg, Germany and <sup>5</sup>National Centre of Tumor Diseases, Heidelberg, Germany

Correspondence: [p.yadav@dkfz.de](mailto:p.yadav@dkfz.de)  
doi:10.3324/haematol.2017.184226

## **SUPPLEMENTARY DATA**

**Cytogenetic aberrations in multiple myeloma are associated with shifts  
in serum immunoglobulin isotypes distribution and levels**

## Supplementary Methods

### *Serum Immunoglobulin measurements*

The concentrations of serum intact immunoglobulins and free light chains (FLCs) were measured by a latex enhanced immunoassay on a Behring 2 nephelometer, except for IgG which was measured by electrophoresis. The reference ranges were used according to the manufacturer's instructions as follows: 3.3–19.4 mg/L for kappa light chain, 5.7–26.3 mg/L for lambda light chain and 0.3–1.6 for kappa/lambda ratio. The FLC test was considered positive when the criteria of both an abnormal FLC ratio and an elevation of the involved light chain above the respective upper range were met. Immunofixation of serum was performed using the Paragon Electrophoresis System kit by Beckman Coulter. In case of an ambiguous result, the immunofixation was repeated after prior denaturation with 2-mercaptoethanol and kits by Dako, Binding Site or Technoclon were applied additionally.

## Supplementary Tables

**Supplementary Table S1.** Patient characteristics from GMMG-MM5 and GMMG-HD4 clinical trials.

|                                                | <b>GMMG-MM5 (Total =523)</b>  | <b>GMMG-HD4 (Total=325)</b>  |
|------------------------------------------------|-------------------------------|------------------------------|
| Male                                           | 312 (60%)                     | 191 (59%)                    |
| Age (years)                                    | 58±8 (32–70)                  | 55±7 (27–65)                 |
| ISS <sup>a</sup> (Stage 1/2/3)                 | 197 (38%)/180 (34%)/146 (28%) | 125 (41%)/105 (34%)/76 (25%) |
| <i>Myeloma with involved heavy/light chain</i> |                               |                              |
| IgGκ                                           | 230 (44%)                     | 154 (48%)                    |
| IgGλ                                           | 88 (17%)                      | 37 (11%)                     |
| IgAκ                                           | 64 (12%)                      | 36 (11%)                     |
| IgAλ                                           | 42 (8%)                       | 38 (12%)                     |
| LCO-κ                                          | 56 (11%)                      | 28 (9%)                      |
| LCO-λ                                          | 34 (6%)                       | 27 (8%)                      |
| Others <sup>b</sup>                            | 9 (2%)                        | 4 (1%)                       |

Age is presented as mean± standard deviation (range). LCO: light chain only disease; ISS: international staging system. <sup>a</sup> GMMG-HD4 had 19 missing values.

<sup>b</sup> included additional 9 patients (1 IgMλ, 1 IgDκ and 7 IgDλ) in GMMG-MM5 and 5 patients (1 IgMκ, 1 IgDκ, 2 IgDλ and 1 missing) in GMMG-HD4.

**Supplementary Table S2.** Proportion of positivity for cytogenetic abnormalities (CAs) in IgG isotypes.

| CA              | Proportion     |               | P                          |
|-----------------|----------------|---------------|----------------------------|
|                 | IgGκ           | IgGλ          |                            |
| <b>GMMG-MM5</b> | <b>(N=230)</b> | <b>(N=88)</b> |                            |
| t(4;14)         | 0.06 (13/215)  | 0.05 (4/79)   | 1.0                        |
| t(11;14)        | 0.15 (31/210)  | 0.31 (24/78)  | <b>3.7×10<sup>-3</sup></b> |
| t(14;16)        | 0.02 (2/96)    | 0.19 (5/27)   | <b>5.6×10<sup>-3</sup></b> |
| Hyperdiploidy   | 0.70 (145/208) | 0.55 (42/77)  | <b>0.02</b>                |

|                 |                |               |      |
|-----------------|----------------|---------------|------|
| <b>GMMG-HD4</b> | <b>(N=154)</b> | <b>(N=37)</b> |      |
| t(4;14)         | 0.10 (14/142)  | 0.10 (3/31)   | 1.0  |
| t(11;14)        | 0.18 (25/142)  | 0.25 (8/32)   | 0.48 |
| t(14;16)        | 0.01 (1/135)   | 0.03 (1/31)   | 0.34 |
| Hyperdiploidy   | 0.68 (94/138)  | 0.55 (17/31)  | 0.23 |

**Proportion:** each entry represents proportion of CA positive cases. In parentheses are shown the number of CA positive cases and the number of cases tested for this CA.

**N:** total number of cases with this MM isotype.

**P:** P value from a Chi-square test for comparison between isotype matched Igs (e.g. IgGκ vs IgGλ). Fisher's exact test was used when the expected count was less than 5.

**Bold types:** significant differences ( $P \leq 0.05$ ) are shown in bold.

**Supplementary Table S3.** Concentrations of serum M-protein in IgG MM and IgA MM cases based on cytogenetic abnormalities (CAs), showing median values together with ranges.

| CA              | IgG MM            |                 | IgA MM            |                 |
|-----------------|-------------------|-----------------|-------------------|-----------------|
|                 | M-protein (g/l)   | Number of cases | M-protein (g/l)   | Number of cases |
| <b>GMMG-MM5</b> |                   |                 |                   |                 |
| All cases       | 36.0 (1.5, 125.6) | 318             | 32.3 (1.1, 81.8)  | 106             |
| t(4;14)         | 50.5 (5.7, 125.6) | 17              | 45.3 (7.8, 81.8)  | 22              |
| t(11;14)        | 40.2 (3.5, 82.1)  | 55              | 28.3 (10.9, 60.1) | 13              |
| t(14;16)        | 34.5 (3.1, 102.9) | 7               | 3.7 (2.4, 4.9)    | 2               |
| any IgH         | 42.6 (3.5, 125.6) | 67              | 42.4 (2.4, 81.8)  | 28              |
| Hyperdiploidy   | 34.0 (1.5, 95.6)  | 84              | 19.0 (1.5, 79.2)  | 18              |
| <b>GMMG-HD4</b> |                   |                 |                   |                 |
| All cases       | 42.0 (0.6, 106.1) | 191             | 35.8 (0, 73.0)    | 74              |
| t(4;14)         | 54.1 (20.9, 90.5) | 17              | 53.9 (0, 67.9)    | 18              |
| t(11;14)        | 45.1 (3.1, 86.8)  | 33              | 44.9 (29.2, 54.5) | 8               |
| t(14;16)        | 37.0 (24.5, 49.5) | 2               | 54.6 (54.6, 54.6) | 1               |
| any IgH         | 46.1 (3.1, 90.5)  | 39              | 44.9 (0, 73.0)    | 21              |
| Hyperdiploidy   | 41.7 (3.5, 91.1)  | 93              | 39.1 (13.1, 72.7) | 24              |

**Supplementary Table S4.** Concentration of serum uninvolved immunoglobulins and free light chains (FLCs) depending upon cytogenetic abnormalities (CAs) in IgG MM, IgA MM and LCO MM cases.

| CA                    | Laboratory parameter | Reference range* | Median (m <sub>1</sub> , m <sub>2</sub> ) | Cases (n <sub>1</sub> , n <sub>2</sub> ) | BETA  | P           |
|-----------------------|----------------------|------------------|-------------------------------------------|------------------------------------------|-------|-------------|
| <b>IgG MM (N=318)</b> |                      |                  |                                           |                                          |       |             |
| t(4;14)               | IgA (g/l)            | 0.7–3.8          | 0.4, 0.3                                  | 17, 275                                  | 0.14  | 0.17        |
|                       | IgM (g/l)            | 0.4–2.8          | 0.2, 0.2                                  | 17, 275                                  | 0.07  | 0.47        |
|                       | FLCκ (mg/l)          | 3.3–19.4         | 31.0, 89.5                                | 17, 274                                  | 0.13  | 0.51        |
|                       | FLCλ (mg/l)          | 5.7–26.3         | 8.6, 8.2                                  | 17, 274                                  | 0.10  | 0.52        |
| t(11;14)              | IgA (g/l)            | 0.7–3.8          | <b>0.25, 0.33</b>                         | 54, 232                                  | -0.14 | <b>0.03</b> |
|                       | IgM (g/l)            | 0.4–2.8          | <b>0.16, 0.20</b>                         | 54, 232                                  | -0.13 | <b>0.02</b> |
|                       | FLCκ (mg/l)          | 3.3–19.4         | 37.9, 99.3                                | 54, 231                                  | 0.01  | 0.95        |
|                       | FLCλ (mg/l)          | 5.7–26.3         | 9.9, 8.0                                  | 54, 231                                  | -0.03 | 0.77        |
| t(14;16)              | IgA (g/l)            | 0.7–3.8          | 0.27, 0.34                                | 7, 116                                   | 0.11  | 0.57        |
|                       | IgM (g/l)            | 0.4–2.8          | 0.08, 0.20                                | 7, 116                                   | -0.14 | 0.38        |
|                       | FLCκ (mg/l)          | 3.3–19.4         | 13.0, 124.5                               | 7, 116                                   | -0.13 | 0.74        |
|                       | FLCλ (mg/l)          | 5.7–26.3         | 218.0, 6.9                                | 7, 116                                   | 0.37  | 0.16        |
| gain 1q21             | IgA (g/l)            | 0.7–3.8          | 0.28, 0.33                                | 99, 188                                  | 0.04  | 0.45        |
|                       | IgM (g/l)            | 0.4–2.8          | 0.2, 0.2                                  | 99, 188                                  | 0.00  | 0.99        |
|                       | FLCκ (mg/l)          | 3.3–19.4         | 23, 118                                   | 100, 186                                 | -0.12 | 0.27        |
|                       | FLCλ (mg/l)          | 5.7–26.3         | <b>9.3, 7.4</b>                           | 100, 186                                 | 0.20  | <b>0.01</b> |
| Hyperdiploidy         | IgA (g/l)            | 0.7–3.8          | 0.33, 0.26                                | 187, 96                                  | 0.05  | 0.40        |
|                       | IgM (g/l)            | 0.4–2.8          | 0.2, 0.2                                  | 187, 96                                  | 0.01  | 0.77        |
|                       | FLCκ (mg/l)          | 3.3–19.4         | 107.5, 52.2                               | 186, 96                                  | -0.01 | 0.93        |
|                       | FLCλ (mg/l)          | 5.7–26.3         | 7.4, 9.3                                  | 186, 96                                  | -0.09 | 0.27        |
| del (13q)             | IgA (g/l)            | 0.7–3.8          | 0.28, 0.33                                | 123, 170                                 | -0.03 | 0.57        |
|                       | IgM (g/l)            | 0.4–2.8          | 0.21, 0.18                                | 123, 170                                 | 0.03  | 0.50        |
|                       | FLCκ (mg/l)          | 3.3–19.4         | 43.9, 102.1                               | 122, 170                                 | -0.02 | 0.83        |
|                       | FLCλ (mg/l)          | 5.7–26.3         | 8.5, 7.4                                  | 122, 170                                 | -0.06 | 0.43        |
| del (17p)             | IgA (g/l)            | 0.7–3.8          | 0.4, 0.3                                  | 30, 264                                  | -0.01 | 0.92        |
|                       | IgM (g/l)            | 0.4–2.8          | 0.2, 0.2                                  | 30, 264                                  | -0.02 | 0.79        |
|                       | FLCκ (mg/l)          | 3.3–19.4         | 276.5, 62.6                               | 30, 263                                  | 0.07  | 0.64        |
|                       | FLCλ (mg/l)          | 5.7–26.3         | 5.6, 8.5                                  | 30, 263                                  | -0.19 | 0.12        |

|                       |             |          |                   |        |       |                            |
|-----------------------|-------------|----------|-------------------|--------|-------|----------------------------|
| <b>IgA MM (N=106)</b> |             |          |                   |        |       |                            |
| t(4;14)               | IgG (g/l)   | 7.0–16.0 | 3.0, 3.6          | 22, 75 | -0.10 | 0.10                       |
|                       | IgM (g/l)   | 0.4–2.8  | 0.17, 0.18        | 21, 75 | -0.05 | 0.58                       |
|                       | FLCκ (mg/l) | 3.3–19.4 | 31.4, 26.0        | 22, 75 | -0.05 | 0.83                       |
|                       | FLCλ (mg/l) | 5.7–26.3 | 8.0, 9.0          | 22, 74 | -0.15 | 0.46                       |
| t(11;14)              | IgG (g/l)   | 7.0–16.0 | 3.1, 3.5          | 13, 82 | -0.08 | 0.26                       |
|                       | IgM (g/l)   | 0.4–2.8  | 0.1, 0.2          | 13, 81 | -0.13 | 0.24                       |
|                       | FLCκ (mg/l) | 3.3–19.4 | 24.6, 30.8        | 13, 82 | -0.40 | 0.16                       |
|                       | FLCλ (mg/l) | 5.7–26.3 | 6.4, 8.7          | 13, 81 | -0.13 | 0.62                       |
| t(14;16)              | IgG (g/l)   | 7.0–16.0 | 3.5, 3.3          | 2, 43  | -0.09 | 0.65                       |
|                       | IgM (g/l)   | 0.4–2.8  | 0.1, 0.2          | 2, 42  | -0.28 | 0.12                       |
|                       | FLCκ (mg/l) | 3.3–19.4 | 16.5, 31.4        | 2, 43  | -0.59 | 0.37                       |
|                       | FLCλ (mg/l) | 5.7–26.3 | 3005.8, 8.4       | 2, 43  | 0.58  | 0.30                       |
| gain 1q21             | IgG (g/l)   | 7.0–16.0 | <b>3.0, 4.1</b>   | 54, 41 | -0.15 | <b>3.7×10<sup>-3</sup></b> |
|                       | IgM (g/l)   | 0.4–2.8  | <b>0.17, 0.20</b> | 53, 41 | -0.19 | <b>0.01</b>                |
|                       | FLCκ (mg/l) | 3.3–19.4 | 21.1, 31.7        | 54, 41 | -0.13 | 0.51                       |

|               |             |          |                 |        |       |             |
|---------------|-------------|----------|-----------------|--------|-------|-------------|
|               | FLCλ (mg/l) | 5.7–26.3 | 9.1, 8.5        | 53, 41 | -0.17 | 0.34        |
| Hyperdiploidy | IgG (g/l)   | 7.0–16.0 | <b>4.2, 3.0</b> | 50, 44 | 0.13  | <b>0.01</b> |
|               | IgM (g/l)   | 0.4–2.8  | 0.20, 0.17      | 49, 44 | 0.08  | 0.28        |
|               | FLCκ (mg/l) | 3.3–19.4 | 32.8, 13.2      | 50, 44 | 0.19  | 0.30        |
|               | FLCλ (mg/l) | 5.7–26.3 | 7.2, 8.8        | 49, 44 | 0.26  | 0.10        |
| del (13q)     | IgG (g/l)   | 7.0–16.0 | <b>3.0, 4.2</b> | 53, 44 | -0.11 | <b>0.03</b> |
|               | IgM (g/l)   | 0.4–2.8  | 0.17, 0.20      | 52, 44 | -0.09 | 0.24        |
|               | FLCκ (mg/l) | 3.3–19.4 | 30.9, 21.2      | 53, 44 | -0.07 | 0.74        |
|               | FLCλ (mg/l) | 5.7–26.3 | <b>7.8, 9.0</b> | 52, 44 | -0.34 | <b>0.04</b> |
| del (17p)     | IgG (g/l)   | 7.0–16.0 | 2.6, 3.5        | 13, 84 | -0.02 | 0.80        |
|               | IgM (g/l)   | 0.4–2.8  | 0.1, 0.2        | 12, 84 | -0.13 | 0.23        |
|               | FLCκ (mg/l) | 3.3–19.4 | 10.3, 28.4      | 13, 84 | 0.03  | 0.93        |
|               | FLCλ (mg/l) | 5.7–26.3 | 24.7, 8.3       | 13, 83 | -0.08 | 0.74        |

| LCO MM (N=90) |             |          |                  |        |       |             |
|---------------|-------------|----------|------------------|--------|-------|-------------|
| t(4;14)       | IgA (g/l)   | 0.7–3.8  | 0.3, 0.4         | 5, 71  | -0.15 | 0.45        |
|               | IgG (g/l)   | 7.0–16.0 | 4.3, 4.8         | 5, 71  | -0.18 | 0.07        |
|               | IgM (g/l)   | 0.4–2.8  | 0.12, 0.20       | 5, 70  | -0.23 | 0.16        |
|               | FLCκ (mg/l) | 3.3–19.4 | 2810, 486        | 5, 71  | 0.26  | 0.48        |
|               | FLCλ (mg/l) | 5.7–26.3 | 11.2, 13.3       | 5, 71  | 0.08  | 0.80        |
| t(11;14)      | IgA (g/l)   | 0.7–3.8  | 0.4, 0.3         | 29, 42 | -0.08 | 0.37        |
|               | IgG (g/l)   | 7.0–16.0 | 4.8, 4.6         | 29, 42 | 0.02  | 0.63        |
|               | IgM (g/l)   | 0.4–2.8  | 0.18, 0.19       | 28, 42 | -0.08 | 0.31        |
|               | FLCκ (mg/l) | 3.3–19.4 | <b>437, 719</b>  | 29, 42 | -0.40 | <b>0.02</b> |
|               | FLCλ (mg/l) | 5.7–26.3 | 16.3, 11.4       | 29, 42 | -0.11 | 0.45        |
| t(14;16)      | IgA (g/l)   | 0.7–3.8  | 2.0, 0.3         | 2, 23  | -0.08 | 0.79        |
|               | IgG (g/l)   | 7.0–16.0 | 2.4, 4.9         | 2, 23  | 0.21  | 0.39        |
|               | IgM (g/l)   | 0.4–2.8  | 0.14, 0.21       | 2, 23  | 0.07  | 0.81        |
|               | FLCκ (mg/l) | 3.3–19.4 | 6503, 633        | 2, 23  | 0.87  | 0.38        |
|               | FLCλ (mg/l) | 5.7–26.3 | 2213.7, 11.2     | 2, 23  | 0.73  | 0.25        |
| gain 1q21     | IgA (g/l)   | 0.7–3.8  | <b>0.2, 0.5</b>  | 25, 50 | -0.29 | <b>0.01</b> |
|               | IgG (g/l)   | 7.0–16.0 | <b>4.1, 5.0</b>  | 25, 50 | -0.12 | <b>0.03</b> |
|               | IgM (g/l)   | 0.4–2.8  | <b>0.1, 0.2</b>  | 25, 49 | -0.21 | <b>0.02</b> |
|               | FLCκ (mg/l) | 3.3–19.4 | 7, 733           | 25, 50 | -0.22 | 0.25        |
|               | FLCλ (mg/l) | 5.7–26.3 | 250, 11          | 25, 50 | -0.18 | 0.25        |
| Hyperdiploidy | IgA (g/l)   | 0.7–3.8  | <b>0.3, 0.4</b>  | 23, 49 | 0.21  | <b>0.04</b> |
|               | IgG (g/l)   | 7.0–16.0 | 4.9, 4.3         | 23, 49 | 0.06  | 0.23        |
|               | IgM (g/l)   | 0.4–2.8  | 0.20, 0.18       | 23, 48 | 0.09  | 0.30        |
|               | FLCκ (mg/l) | 3.3–19.4 | <b>506, 534</b>  | 23, 49 | 0.36  | <b>0.05</b> |
|               | FLCλ (mg/l) | 5.7–26.3 | 13.5, 11.2       | 23, 49 | 0.23  | 0.14        |
| del (13q)     | IgA (g/l)   | 0.7–3.8  | 0.4, 0.4         | 48, 27 | -0.05 | 0.62        |
|               | IgG (g/l)   | 7.0–16.0 | 4.2, 6.1         | 48, 27 | -0.09 | 0.11        |
|               | IgM (g/l)   | 0.4–2.8  | 0.17, 0.25       | 47, 27 | -0.13 | 0.14        |
|               | FLCκ (mg/l) | 3.3–19.4 | 496, 633         | 48, 27 | 0.22  | 0.27        |
|               | FLCλ (mg/l) | 5.7–26.3 | 12.4, 11.5       | 48, 27 | -0.07 | 0.65        |
| del (17p)     | IgA (g/l)   | 0.7–3.8  | 0.3, 0.4         | 7, 70  | 0.02  | 0.91        |
|               | IgG (g/l)   | 7.0–16.0 | 4.0, 4.9         | 7, 70  | 0.02  | 0.81        |
|               | IgM (g/l)   | 0.4–2.8  | 0.1, 0.2         | 6, 70  | -0.12 | 0.43        |
|               | FLCκ (mg/l) | 3.3–19.4 | <b>2130, 464</b> | 7, 70  | 0.78  | <b>0.01</b> |
|               | FLCλ (mg/l) | 5.7–26.3 | 8.0, 13.4        | 7, 70  | -0.11 | 0.64        |

**m1, m2:** median concentration of serum immunoglobulins and FLC in CA positive and CA negative cases, respectively.

**n1, n2:** number of CA positive and CA negative cases, respectively.

**BETA, P:** estimate of coefficient and p value for CA in a multiple linear model involving logarithmic transformed laboratory parameter as dependent variable and international staging system (ISS), sex, light chain type, bone marrow cell count and secondary CAs as independent variables.

**Bold types:** median concentrations shown in bold for  $P \leq 0.05$ .

\* Reference ranges were as reported at the <http://www.laborlexikon.de/Vision.htm> or by the International Myeloma Foundation.

**LCO:** light chain only
