# Supplementary material
Source: PubMed Central journal article supplement (PMC5865437)
Supplement: 2017_184226-Disclosures_and_Contributions.pdf [file 2017_184226-Disclosures_and_Contributions.pdf]

Haematologica  
HAEMATOL/2017/184226  
Version 3

Cytogenetic aberrations in multiple myeloma are associated with shifts  
in serum immunoglobulin isotypes distribution and levels

Pankaj Yadav, Maximillian Merz, Elias K. Mai, Asta Försti, Anna Jauch,  
Hartmut Goldschmidt, and Kari Hemminki

Disclosures: Authors declare that there are no competing financial interests.

Contributions: PY analyzed the data; HG, MM, EKM collected and organized the German patient data; AJ was responsible for cytogenetics; KH, AF and HG designed the study; KH and PY wrote the first manuscript draft; all authors contributed by comments and approved the final manuscript.
